# Supplementary material for: The Central Role of the F-Actin Surface in Myosin Force Generation
Source: MDPI journal article supplement (doi:10.3390/biology10121221), 2021-11-23
Supplement: s1 [file s1]

## **Supplementary Information**

**The central role of the F-actin surface in myosin force generation**

**Matthew H. Doran and William Lehman**

**Supplementary Table S1: F-actin Binding Proteins Description**

| Protein Name                         | Function                                                    | Actin-Binding Domain        | Actin Localization    |
|--------------------------------------|-------------------------------------------------------------|-----------------------------|-----------------------|
| Spectrin [1]                         | Cytoskeletal organization                                   | CH domain                   | D-loop, SD1, SD2      |
| Utrophin [2]                         | Anchors neuromuscular junction                              | CH domain                   | D-loop, SD1, SD2      |
| Plastin [3]                          | F-actin bundling protein                                    | CH domain                   | D-loop, SD1, SD2      |
| LifeAct [4,5]                        | F-actin marker                                              | -                           | D-loop                |
| Cofilin [6]                          | F-actin severing                                            | -                           | D-loop, SD1, SD2      |
| MLCK [7]                             | Regulate smooth muscle contraction                          | -                           | SD1, SD4              |
| Villin [8]                           | F-actin bundling protein                                    | Headpiece Domain            | -                     |
| Scruin [9]                           | F-actin cross-linker                                        | -                           | SD1, SD2, SD3         |
| Troponin [10]                        | Ca <sup>2+</sup> dependent regulation of muscle contraction | -                           | -                     |
| Tropomyosin [11]                     | Ca <sup>2+</sup> dependent regulation of muscle contraction | $\alpha/\beta$ pseudorepeat | SD3, SD4              |
| N-term Myosin Binding Protein C [12] | Modulates actin-myosin binding                              | -                           | SD1                   |
| Myosin [13]                          | Generating force on F-actin                                 | -                           | D-loop, SD1, SD2, SD3 |
| Calponin [14]                        | Modulates actin-myosin binding                              | CH domain                   | D-loop                |
| Coronin [15]                         | Remodeling actin cytoskeleton                               | Beta-Propeller Domain       | -                     |
| $\alpha$ -catenin [16]               | Tethers cell-cell adhesion to cytoskeleton                  | -                           | D-loop, SD1, SD2, SD3 |
| Metavinculin [16]                    | Anchoring actin to membrane                                 | -                           | D-loop, SD1, SD2      |
| Formin [17]                          | Remodeling of cytoskeleton                                  | FH2                         | SD1, SD2, SD3, SD4    |
| $\alpha$ -actinin [18]               | Actin cross-linker in sarcomeres z band                     | CH domain                   | D-loop, SD1, SD2      |
| Leiomodin [19]                       | F-actin cross-linker                                        | WH2-domain                  | SD1, SD2              |
| Tropomodulin [19]                    | Capping protein                                             |                             | SD1, SD2              |

**Table S1: F-actin-binding Proteins.** Summary of F-actin binding proteins. 20 F-actin binding proteins, their function, and localization on the actin filament have been tabulated to show their diversity of function. Notably, many F-actin binding proteins bind to the D-loop hydrophobic patch at the junction between two actin subunits.

**Supplementary Table S2: Summary of cryo-EM structures deposited in the PDB.**

| PDB Code      | EMDB Code | Resolution | Actin Species                                | Tropomyosin Species   | Myosin Species                               | Isoform Name                      | Isoform Function                   | Bound State |
|---------------|-----------|------------|----------------------------------------------|-----------------------|----------------------------------------------|-----------------------------------|------------------------------------|-------------|
| 6x5z*<br>[20] | 22067     | 4.2        | Chicken ACTA1 - P68139)                      | Human TPM1 - P09493   | Bovine MYH7 - Q9BE39                         | $\beta$ -cardiac muscle myosin II | Sarcomeric                         | Rigor       |
| 5jlh*<br>[21] | 8164      | 3.9        | Human ACTG1 - P63261                         | Human TPM3 - P06753   | Human MYH14 - Q7Z406)                        | Non-muscle myosin IIc (NM2c)      | Cytoskeletal Motor                 | Rigor       |
| 7jh7*<br>[22] | 22335     | 3.8        | Wild Boar ACTC1 - B6VNT8                     | Porcine TMP1 - P42639 | Wild Boar MYH7 - P79293                      | $\beta$ -cardiac muscle myosin II | Sarcomeric                         | Rigor       |
| 6c1d*<br>[23] | 7329      | 3.2        | Rabbit ACTA1 - P68135                        | N/A                   | Rat Myo1b - Q05096                           | Unconventional myosin 1b (Myo1b)  | Cytoskeletal Motor                 | ADP         |
| 6c1h*<br>[23] | 7331      | 3.9        | Rabbit ACTA1 - P68135                        | N/A                   | Rat Myo1b - Q05096                           | Unconventional myosin 1b (Myo1b)  | Cytoskeletal Motor                 | Rigor       |
| 6c1g*<br>[23] | 7330      | 3.8        | Rabbit ACTA1 - P68135                        | N/A                   | Rat Myo1b - Q05096                           | Unconventional myosin 1b (Myo1b)  | Cytoskeletal Motor                 | ADP         |
| 7aln*<br>[24] | 11818     | 3.8        | <i>Plasmodium Falciparum</i> PfAct1 - Q8I4X0 | N/A                   | <i>Plasmodium Falciparum</i> PfMyoA - Q8IDR3 | PfMyoA                            | <i>Plasmodium</i> gliding motility | Rigor       |
| 6BNP*<br>[25] | 7116      | 4.6        | Rabbit ACTA1 - P68135                        | N/A                   | Wild Boar MYO6 - Q29122                      | Unconventional myosin 6           | (-) End Cytoskeletal Motor         | Rigor       |
| 6BNQ*<br>[25] | 7117      | 5.5        | Rabbit ACTA1 - P68135                        | N/A                   | Wild Boar MYO6 - Q29122                      | Unconventional myosin 6           | (-) End Cytoskeletal Motor         | ADP         |
| 5h53*<br>[80] | 6664      | 5.2        | Rabbit ACTA1 - P68135                        | N/A                   | Rabbit MYH13 - Q9GJP9                        | Skeletal muscle myosin II         | Sarcomeric                         | Rigor       |
| 6bih<br>[26]  | 7100      | 6.0        | Rabbit ACTA1 - P68135                        | N/A                   | Chicken MYH11 - P10587                       | Smooth muscle myosin II           | Smooth Muscle Contraction          | Rigor       |
| 4a7f<br>[13]  | 1987      | 7.7        | Rabbit ACTA1 - P68135                        | Rabbit TPM1 - P58772  | Dictostelium MYOE - Q03479                   | Unconventional myosin IE          | Cytoskeletal Motor                 | Rigor       |

**Table S2: Summary of cryo-EM structures deposited in the PDB.** All currently published actin-myosin cryo-EM structures are tabulated in order to compare relevant information. The resolution is reported as listed in the RCSB Protein Data Bank (PDB)/ EM Data Bank (EMDB) pages. Species Uniprot sequences were taken from the PDB. The seven isoforms, which report resolution high enough to define the protein backbone ( $<5.2\text{\AA}$ ) compared **Figures 4-7** are listed with a star next to their PDB code. The citation associated with the PDB entries are also listed in the same column. Since 6X5Z and 7JH7 both contain  $\beta$ -cardiac muscle myosin II isoforms that are nearly identical at the actin-myosin interface, only one is used for comparisons.

**Supplementary Table S3: Strength of the Actin-Myosin Interface Regions**

| Myosin Isoform                          | Cardiomyopathy Loop                                        | HLH Motif                                                  | Loop 3                                                     | Loop 4                                                     |
|-----------------------------------------|------------------------------------------------------------|------------------------------------------------------------|------------------------------------------------------------|------------------------------------------------------------|
| <b>β-cardiac muscle myosin II</b>       | Buried Surface: 353.3 Å <sup>2</sup><br>ΔG: -5.0 kcal/mole | Buried Surface: 549.9 Å <sup>2</sup><br>ΔG: -9.8 kcal/mole | No interaction                                             | Buried Surface: 137.4 Å <sup>2</sup><br>ΔG: -0.2 kcal/mole |
| <b>Non-muscle myosin IIc (NM2c)</b>     | Buried Surface: 405.2 Å <sup>2</sup><br>ΔG: -4.1 kcal/mole | Buried Surface: 639.2 Å <sup>2</sup><br>ΔG: -6.6 kcal/mole | Buried Surface: 163.1 Å <sup>2</sup><br>ΔG: -0.8 kcal/mole | Buried Surface: 103.3 Å <sup>2</sup><br>ΔG: 0.4 kcal/mole  |
| <b>Plasmodium Falciparum PfMyoA</b>     | Buried Surface: 339.1 Å <sup>2</sup><br>ΔG: -4.4 kcal/mole | Buried Surface: 605.3 Å <sup>2</sup><br>ΔG: -7.9 kcal/mole | Buried Surface: 242.2 Å <sup>2</sup><br>ΔG: -1.8 kcal/mole | Buried Surface: 182.3 Å <sup>2</sup><br>ΔG: -2.0 kcal/mole |
| <b>Unconventional myosin 6</b>          | Buried Surface: 334.7 Å <sup>2</sup><br>ΔG: -5.0 kcal/mole | Buried Surface: 399.6 Å <sup>2</sup><br>ΔG: -4.5 kcal/mole | Buried Surface: 318.2 Å <sup>2</sup><br>ΔG: 2.3 kcal/mole  | Buried Surface: 208.0 Å <sup>2</sup><br>ΔG: 0.5 kcal/mole  |
| <b>Unconventional myosin 1b (Myo1b)</b> | Buried Surface: 425.5 Å <sup>2</sup><br>ΔG: -3.6 kcal/mole | Buried Surface: 484.5 Å <sup>2</sup><br>ΔG: -4.8 kcal/mole | Buried Surface: 331.9 Å <sup>2</sup><br>ΔG: -1.0 kcal/mole | Buried Surface: 167.5 Å <sup>2</sup><br>ΔG: -1.0 kcal/mole |
| <b>Skeletal muscle myosin II</b>        | Buried Surface: 239.1 Å <sup>2</sup><br>ΔG: -4.1 kcal/mole | Buried Surface: 420.0 Å <sup>2</sup><br>ΔG: -6.5 kcal/mole | Buried Surface: 68.1 Å <sup>2</sup><br>ΔG: 0.5 kcal/mole   | Buried Surface: 38.9 Å <sup>2</sup><br>ΔG: 0.6 kcal/mole   |

**Table S3: Tabulating the strength of each region involved in actin-myosin binding.** The buried surface area as well as the free energy of dissociation (ΔG) for each actin-myosin interface in the six isoforms compared in this review. These values were calculated in the PDB web application, PISA. Each actin-myosin region was extracted from their original pdb files and run through the PISA web app. The tabulated values reflect a trend where the HLH motif is the largest and strongest interface for each isoform (except unconventional myosin 6, which has an unusually large CM loop), followed by the CM loop. The variable loops, Loop 3 and Loop 4 make a comparatively smaller contribution to binding and each isoform has vastly different values for these regions. The activation loop was not shown due to its very small interface with the actin filament. Loop 2 was not included because it does not appear in the β-cardiac muscle myosin II, Non-muscle myosin IIc (NM2c), and Skeletal muscle myosin II cryo-EM densities.

#### Supplementary Citations:

1. Djinojic-Carugo, K.; Gautel, M.; Ylänné, J.; Young, P. The Spectrin Repeat: A Structural Platform for Cytoskeletal Protein Assemblies. *FEBS Lett* **2002**, *513*, 119–123, doi:10.1016/s0014-5793(01)03304-x.
2. Lin, A.Y.; Prochniewicz, E.; James, Z.M.; Svensson, B.; Thomas, D.D. Large-Scale Opening of Utrophin's Tandem Calponin Homology (CH) Domains upon Actin Binding by an Induced-Fit Mechanism. *Proc Natl Acad Sci U S A* **2011**, *108*, 12729–12733, doi:10.1073/pnas.1106453108.
3. Morley, S.C. The Actin-Bundling Protein L-Plastin: A Critical Regulator of Immune Cell Function. *Int J Cell Biol* **2012**, *2012*, 935173, doi:10.1155/2012/935173.
4. Belyy, A.; Merino, F.; Sitsel, O.; Raunser, S. Structure of the Lifeact–F-Actin Complex. *PLOS Biology* **2020**, *18*, e3000925, doi:10.1371/journal.pbio.3000925.
5. Kumari, A.; Kesarwani, S.; Javoor, M.G.; Vinothkumar, K.R.; Sirajuddin, M. Structural Insights into Actin Filament Recognition by Commonly Used Cellular Actin Markers. *EMBO J* **2020**, *39*, e104006, doi:10.15252/embj.2019104006.
6. Tanaka, K.; Takeda, S.; Mitsuoka, K.; Oda, T.; Kimura-Sakiyama, C.; Maéda, Y.; Narita, A. Structural Basis for Cofilin Binding and Actin Filament Disassembly. *Nat Commun* **2018**, *9*, 1860, doi:10.1038/s41467-018-04290-w.
7. Hatch, V.; Zhi, G.; Smith, L.; Stull, J.T.; Craig, R.; Lehman, W. Myosin Light Chain Kinase Binding to a Unique Site on F-Actin Revealed by Three-Dimensional Image Reconstruction. *J Cell Biol* **2001**, *154*, 611–618, doi:10.1083/jcb.200105079.
8. Meng, J.; Vardar, D.; Wang, Y.; Guo, H.-C.; Head, J.F.; McKnight, C.J. High-Resolution Crystal Structures of Villin Headpiece and Mutants with Reduced F-Actin Binding Activity. *Biochemistry* **2005**, *44*, 11963–11973, doi:10.1021/bi050850x.
9. Owen, C.; DeRosier, D. A 13-A Map of the Actin-Scruin Filament from the Limulus Acrosomal Process. *J Cell Biol* **1993**, *123*, 337–344, doi:10.1083/jcb.123.2.337.
10. Yamada, Y.; Namba, K.; Fujii, T. Cardiac Muscle Thin Filament Structures Reveal Calcium Regulatory Mechanism. *Nat Commun* **2020**, *11*, 153, doi:10.1038/s41467-019-14008-1.
11. Lehman, W.; Li, X.; Kiani, F.A.; Moore, J.R.; Campbell, S.G.; Fischer, S.; Rynkiewicz, M.J. Precise Binding of Tropomyosin on Actin Involves Sequence-Dependent Variance in Coiled-Coil Twisting. *Biophysical Journal* **2018**, *115*, 1082–1092, doi:10.1016/j.bpj.2018.08.017.
12. Risi, C.; Belknap, B.; Forgacs-Lonart, E.; Harris, S.P.; Schröder, G.F.; White, H.D.; Galkin, V.E. N-Terminal Domains of Cardiac Myosin Binding Protein C Cooperatively Activate the Thin Filament. *Structure* **2018**, *26*, 1604-1611.e4, doi:10.1016/j.str.2018.08.007.
13. Behrmann, E.; Müller, M.; Penczek, P.A.; Mannherz, H.G.; Manstein, D.J.; Raunser, S. Structure of the Rigor Actin-Tropomyosin-Myosin Complex. *Cell* **2012**, *150*, 327–338, doi:10.1016/j.cell.2012.05.037.
14. Hartwig, J.H. Actin-Binding Proteins 1: Spectrin Superfamily. *Protein Profile* **1994**, *1*, 706–778.
15. de Hostos, E.L.; Bradtke, B.; Lottspeich, F.; Guggenheim, R.; Gerisch, G. Coronin, an Actin Binding Protein of Dictyostelium Discoideum Localized to Cell Surface Projections, Has Sequence Similarities to G Protein Beta Subunits. *EMBO J* **1991**, *10*, 4097–4104.
16. Mei, L.; Espinosa de los Reyes, S.; Reynolds, M.J.; Leicher, R.; Liu, S.; Alushin, G.M. Molecular Mechanism for Direct Actin Force-Sensing by  $\alpha$ -Catenin. *eLife* **2020**, *9*, e62514, doi:10.7554/eLife.62514.
17. Courtemanche, N. Mechanisms of Formin-Mediated Actin Assembly and Dynamics. *Biophys Rev* **2018**, *10*, 1553–1569, doi:10.1007/s12551-018-0468-6.

18. Galkin, V.E.; Orlova, A.; Salmazo, A.; Djinojic-Carugo, K.; Egelman, E.H. Opening of Tandem Calponin Homology Domains Regulates Their Affinity for F-Actin. *Nat Struct Mol Biol* **2010**, *17*, 614–616, doi:10.1038/nsmb.1789.
19. Boczkowska, M.; Rebowksi, G.; Kremneva, E.; Lappalainen, P.; Dominguez, R. How Leiomodin and Tropomodulin Use a Common Fold for Different Actin Assembly Functions. *Nat Commun* **2015**, *6*, 8314, doi:10.1038/ncomms9314.
20. Doran, M.H.; Pavada, E.; Rynkiewicz, M.J.; Walklate, J.; Bullitt, E.; Moore, J.R.; Regnier, M.; Geeves, M.A.; Lehman, W. Cryo-EM and Molecular Docking Shows Myosin Loop 4 Contacts Actin and Tropomyosin on Thin Filaments. *Biophysical Journal* **2020**, doi:10.1016/j.bpj.2020.07.006.
21. von der Ecken, J.; Müller, M.; Lehman, W.; Manstein, D.J.; Penczek, P.A.; Raunser, S. Structure of the F-Actin-Tropomyosin Complex. *Nature* **2015**, *519*, 114–117, doi:10.1038/nature14033.
22. Risi, C.; Schäfer, L.U.; Belknap, B.; Pepper, I.; White, H.D.; Schröder, G.F.; Galkin, V.E. High-Resolution Cryo-EM Structure of the Cardiac Actomyosin Complex. *Structure* **2021**, *29*, 50-60.e4, doi:10.1016/j.str.2020.09.013.
23. Montes, A.; Huehn, A.; Liu, X.; Zwolak, A.; Dominguez, R.; Shuman, H.; Ostap, E.M.; Sindelar, C.V. High-Resolution Cryo-EM Structures of Actin-Bound Myosin States Reveal the Mechanism of Myosin Force Sensing. *Proc Natl Acad Sci U S A* **2018**, *115*, 1292–1297.
24. Robert-Paganin, J.; Xu, X.-P.; Swift, M.F.; Auguin, D.; Robblee, J.P.; Lu, H.; Fagnant, P.M.; Kremntsova, E.B.; Trybus, K.M.; Houdusse, A.; et al. The Actomyosin Interface Contains an Evolutionary Conserved Core and an Ancillary Interface Involved in Specificity. *Nat Commun* **2021**, *12*, 1892, doi:10.1038/s41467-021-22093-4.
25. Gurel, P.S.; Kim, L.Y.; Ruijgrok, P.V.; Omabegho, T.; Bryant, Z.; Alushin, G.M. Cryo-EM Structures Reveal Specialization at the Myosin VI-Actin Interface and a Mechanism of Force Sensitivity. *eLife* **2017**, *6*, e31125, doi:10.7554/eLife.31125.
26. Banerjee, C.; Hu, Z.; Huang, Z.; Warrington, J.A.; Taylor, D.W.; Trybus, K.M.; Lowey, S.; Taylor, K.A. The Structure of the Actin-Smooth Muscle Myosin Motor Domain Complex in the Rigor State. *J Struct Biol* **2017**, *200*, 325–333, doi:10.1016/j.jsb.2017.10.003.
